# Supplementary material for: Stretch dependent electronic structure and vibrational energy of the bipyridine single molecule junction
Source: Royal Society of Chemistry journal article supplement (doi:10.1039/c9cp01442j), 2019-01-01
Supplement: c9cp01442j1.pdf [file c9cp01442j1.pdf]

## Supporting Information

# Stretch Dependent Electronic Structure and Vibrational Energy of the Bipyridine Single Molecule Junction

S. Kobayashi a, S. Kaneko a, S. Fujii a, T. Nishino a, K. Tsukagoshi b and M. Kiguchi a \*

Department of Chemistry, Tokyo Institute of Technology, 2-12-1 W4-10 Ookayama, Meguro-ku, 152-8551 Tokyo, Japan

### 1: Calibration of the displacement ratio of the MCBJ setup

Figure S1 shows the correlation between the conductance of the blank nanogap and relative distance of electrode. In the tunneling mechanism, conductance of the nanogap is represented by

$$G = A_N e^{-BL} \quad (1)$$

The  $B$  value for vacuum gap is  $2.0 \text{ \AA}^{-1}$ , which almost agrees with our experimental  $B$  value of  $1.7 \text{ \AA}^{-1}$ , in Fig.S1. This supports the validity of our estimation of the displacement ratio and the stretch length based on the dimension of the experimental setup.

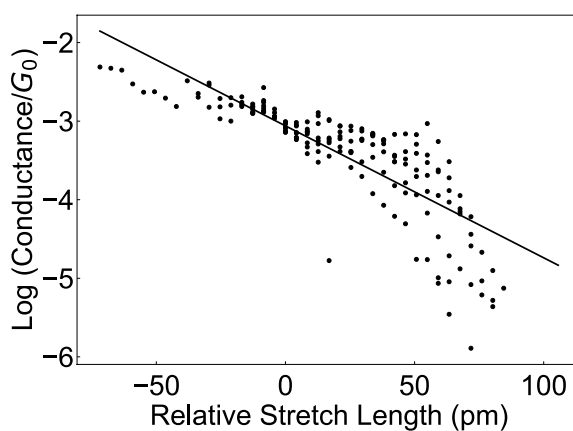

Figure S1. Logarithmic plots of conductance of blank nanogap as a function of stretch length. The plot was obtained from 8 distinct samples. The origin was defined as the point where the conductance was  $0.001 G_0$ , and the stretch length was the relative distance. The line is the fitting result using eq. (1).

### References

- 1 M. Kiguchi and S. Kaneko, *Phys. Chem. Chem. Phys.*, 2013, **15**, 2253-2267.
